# Supplementary material for: Circadian Modulation of the Antioxidant Effect of Grape Consumption: A Randomized Controlled Trial
Source: MDPI journal article supplement (doi:10.3390/ijerph20156502), 2023-08-02
Supplement: s1 [file s1]

## Supplementary Materials

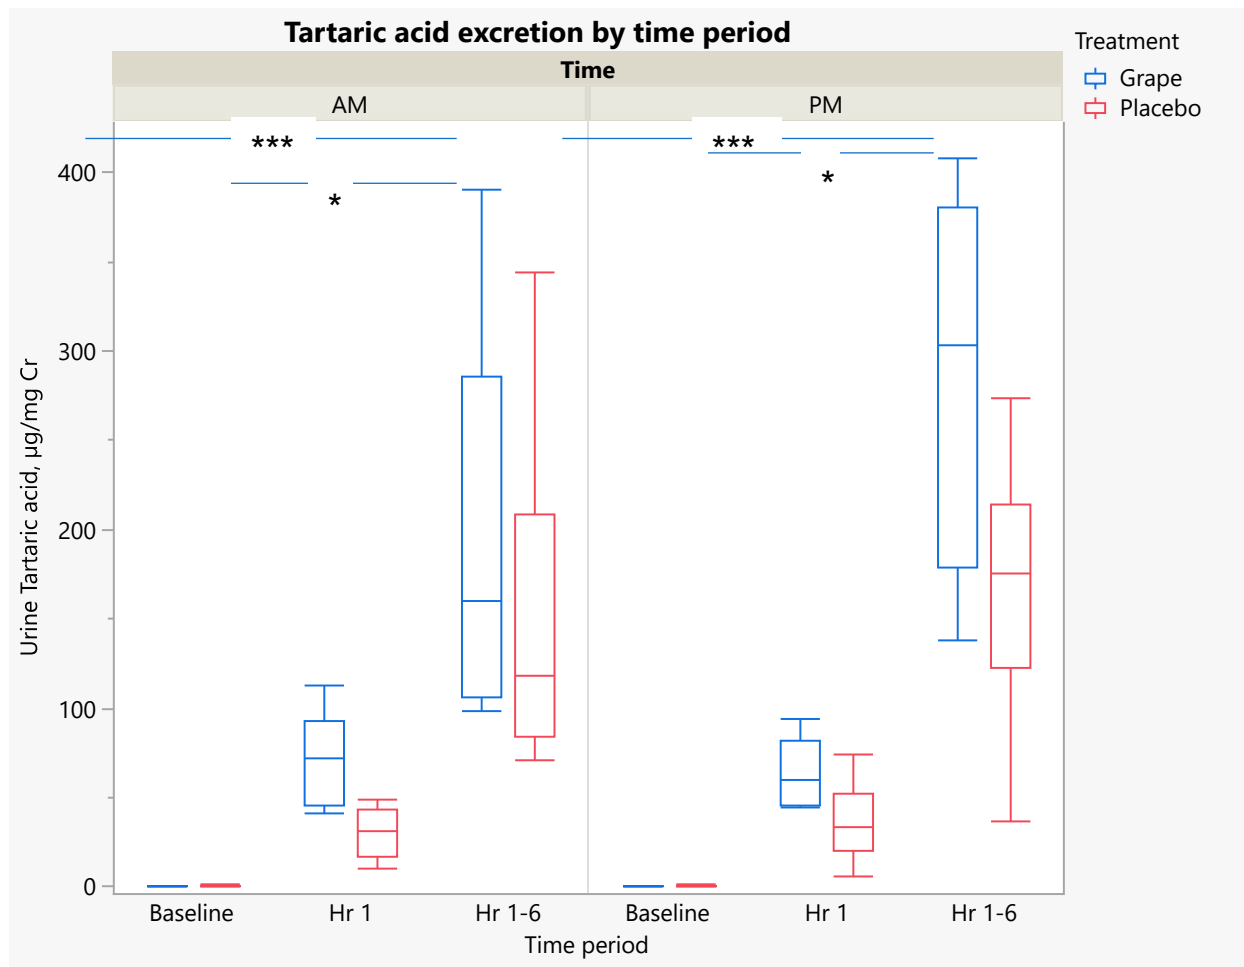

**Figure S1.** Urine tartaric acid excretion by treatment, time and timepoint. Main effects were found for treatment (grape > placebo, \*  $p = 0.04$ ) and time period (1–6 hours > 1 hour > baseline, \*\*\*  $p < 0.0001$ ) but not time ( $p > 0.05$ ).

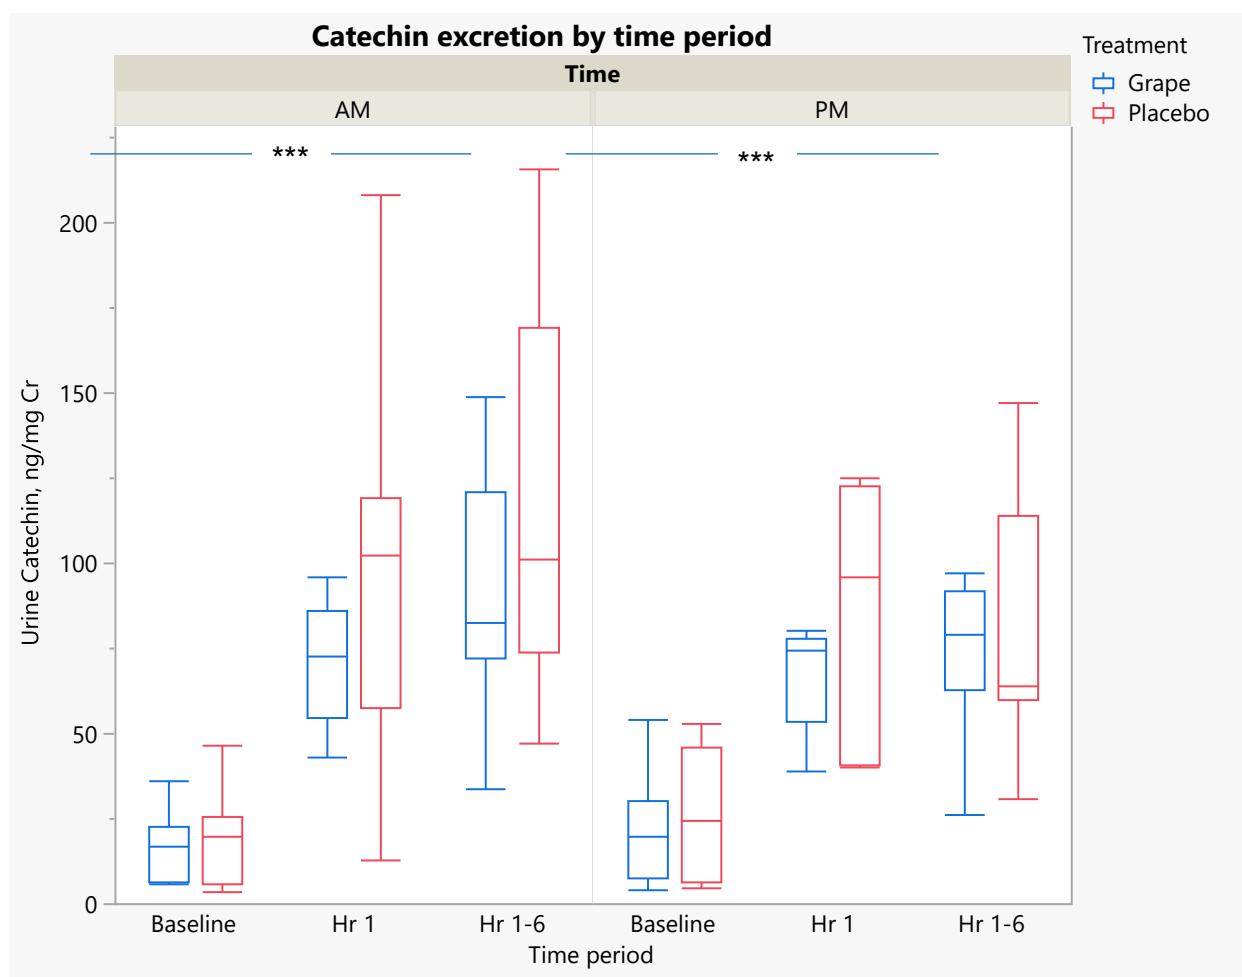

**Figure S2.** Urine catechin excretion by treatment, time and timepoint. A main effect was found for time period (1–6 hours and 1 hour > baseline, \*\*\*  $p < 0.0001$ ). Neither time nor treatment significantly affected catechin excretion measures ( $p > 0.05$ ).

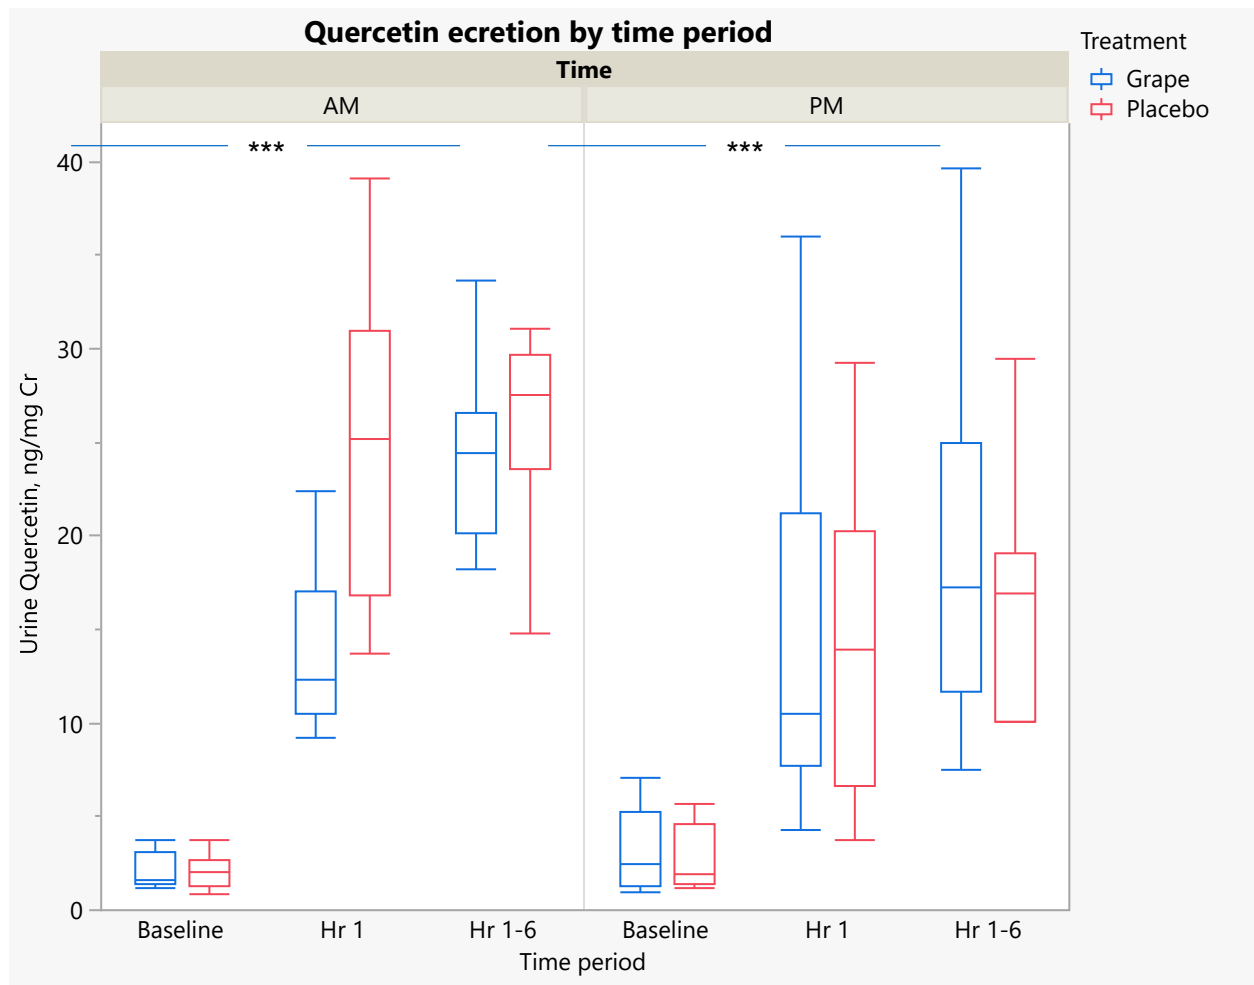

**Figure S3.** Urine quercetin excretion by treatment, time and timepoint. Main effects were found for time (a.m. > p.m.,  $p = 0.03$ ) and time period (1–6 hours > 1 hour > baseline, \*\*\*  $p < 0.0001$ ). Treatment did not demonstrate a significant effect on measures of quercetin excretion ( $p > 0.05$ ).

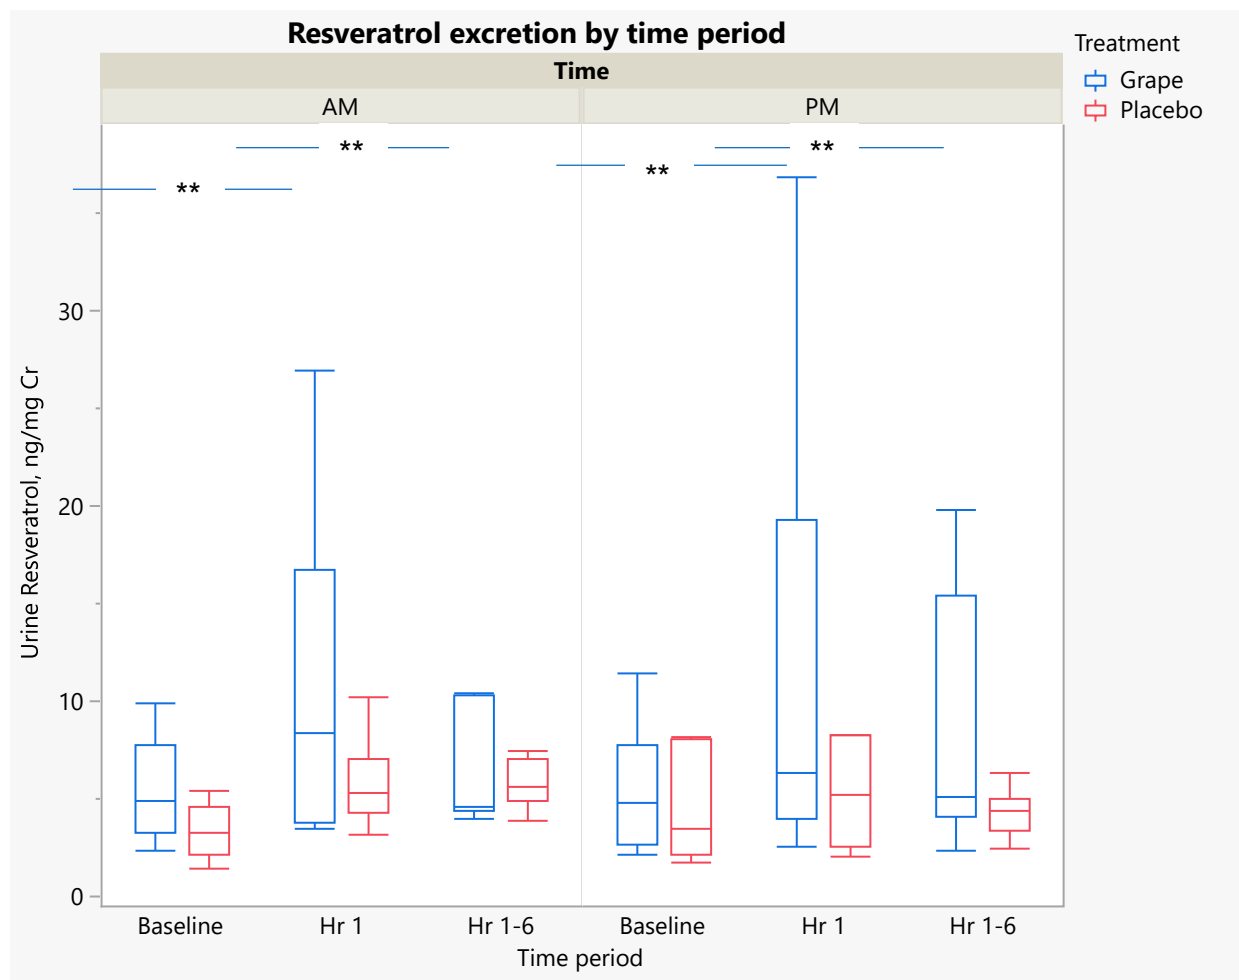

**Figure S4.** Urine resveratrol excretion by treatment, time and timepoint. Main effects were found for treatment (grape > placebo, \*\*  $p = 0.002$ ) and time period (1 hour > baseline, \*\*\*  $p = 0.006$ ) but not time ( $p > 0.05$ ).

**Table S1.** Polyphenol composition of freeze-dried grape powder.

| Polyphenols (mg/kg grape powder) ppm $\pm$ SD) |                  |
|------------------------------------------------|------------------|
| Phenols                                        |                  |
| Catechin                                       | 77.4 $\pm$ 12.5  |
| Epicatechin                                    | 58.9 $\pm$ 10.2  |
| Stilbenes                                      |                  |
| Resveratrol                                    | 13.6 $\pm$ 1.1   |
| Flavanols                                      |                  |
| Quercetin                                      | 148.7 $\pm$ 10.5 |
| Kaempferol                                     | 7.38 $\pm$ 0.62  |
| Isorhamnetin                                   | 13.95 $\pm$ 1.84 |
| Anthocyanins                                   |                  |
| Cyanidin                                       | 266.7 $\pm$ 27.1 |
| Malvidin                                       | 219.3 $\pm$ 31.3 |
| Peonidin                                       | 47.63 $\pm$ 8.62 |

**Table S2.** Antioxidant nutrient intakes standardized to per 1000 kJ of participants during the low-antioxidant diet and usual diet.

|                                     | Low-Antioxidant Days | Usual Diet     | P value |
|-------------------------------------|----------------------|----------------|---------|
|                                     | Mean (SD)            | Mean (SD)      |         |
| Total vitamin A activity (RAE), mcg | 58.66 (38.29)        | 159.72 (77.33) | <0.001  |
| Vitamin C, mg                       | 6.04 (8.10)          | 12.71 (6.37)   | <0.001  |
| Vitamin E (alpha-tocopherol), mg    | 1.03 (0.80)          | 1.77 (0.63)    | <0.001  |
| Selenium, mcg                       | 13.52 (4.45)         | 13.42 (2.46)   | 0.67    |

Low-antioxidant diet data were collected from food records kept by participants two days before each laboratory visit. The total number of foods recorded per participant was 8. Usual diet data were collected from a diet history questionnaire assessing the previous 6 months. SD = standard deviation; RAE = Retinol Activity Equivalent.
